# Supplementary material
Source: Springer Nature journal article supplement (https://www.springermedizin.de/resource/supplementary/12986_2010_316_MOESM1_ESM.pdf/25655816)

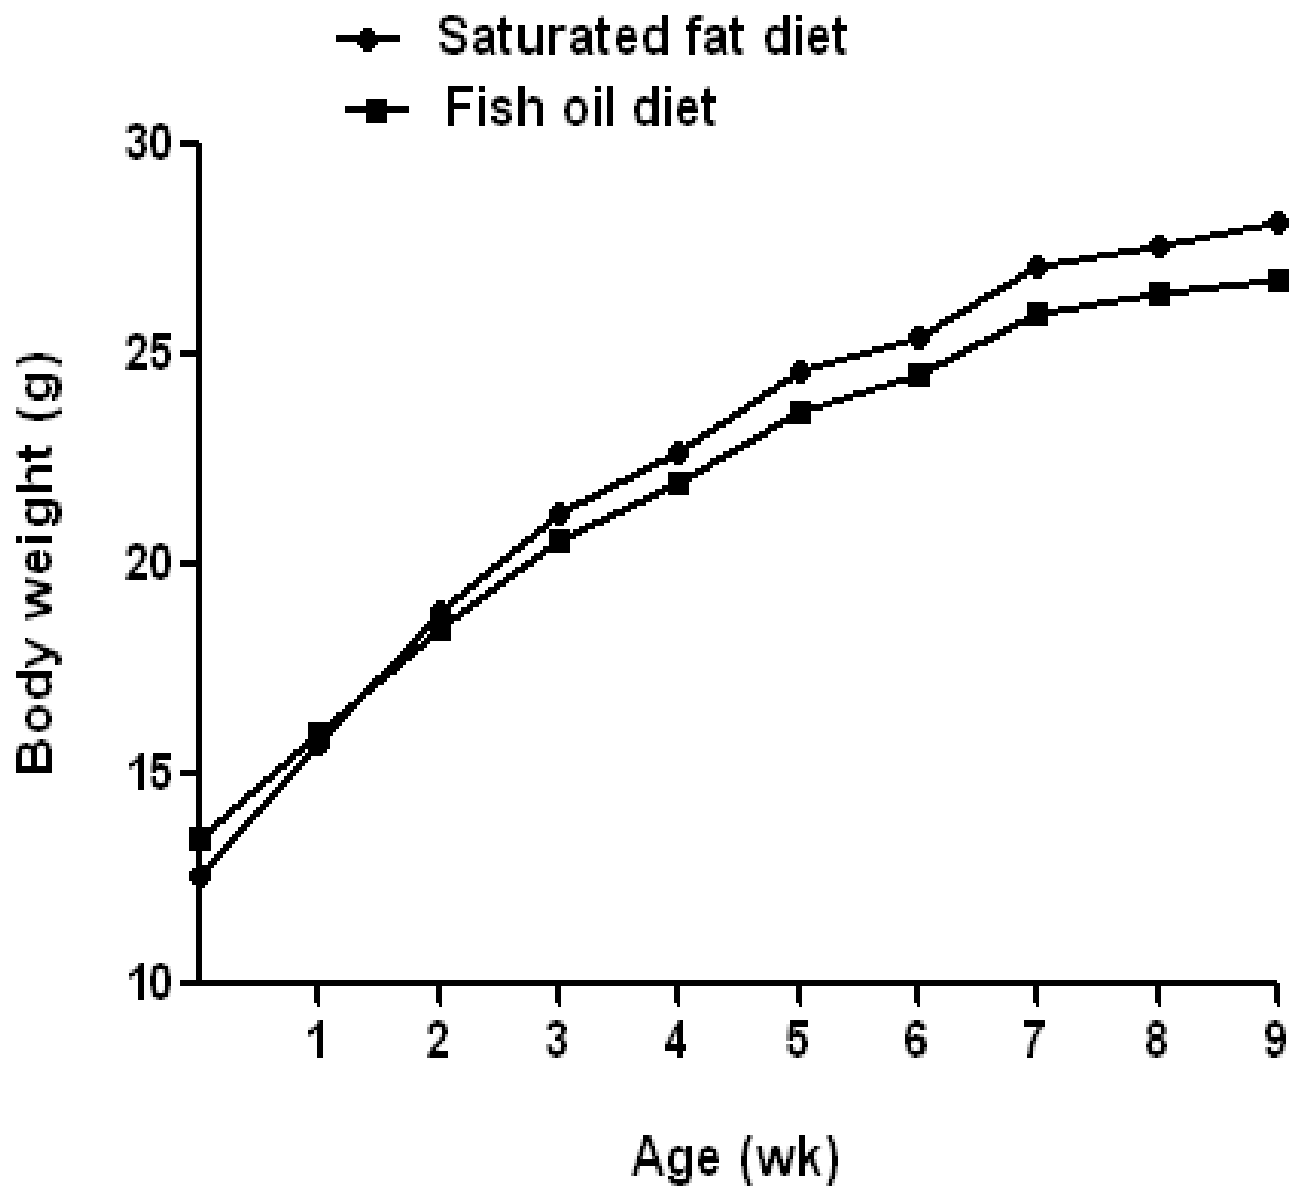

Supplement: MOESM1 [file 25655816]
